# Supplementary material for: The normality assumption on between-study random effects was questionable in a considerable number of Cochrane meta-analyses
Source: Springer Nature journal article supplement (doi:10.1186/s12916-023-02823-9), 2023-03-29
Supplement: MOESM1 [file 25172626]

## **Additional file 1**

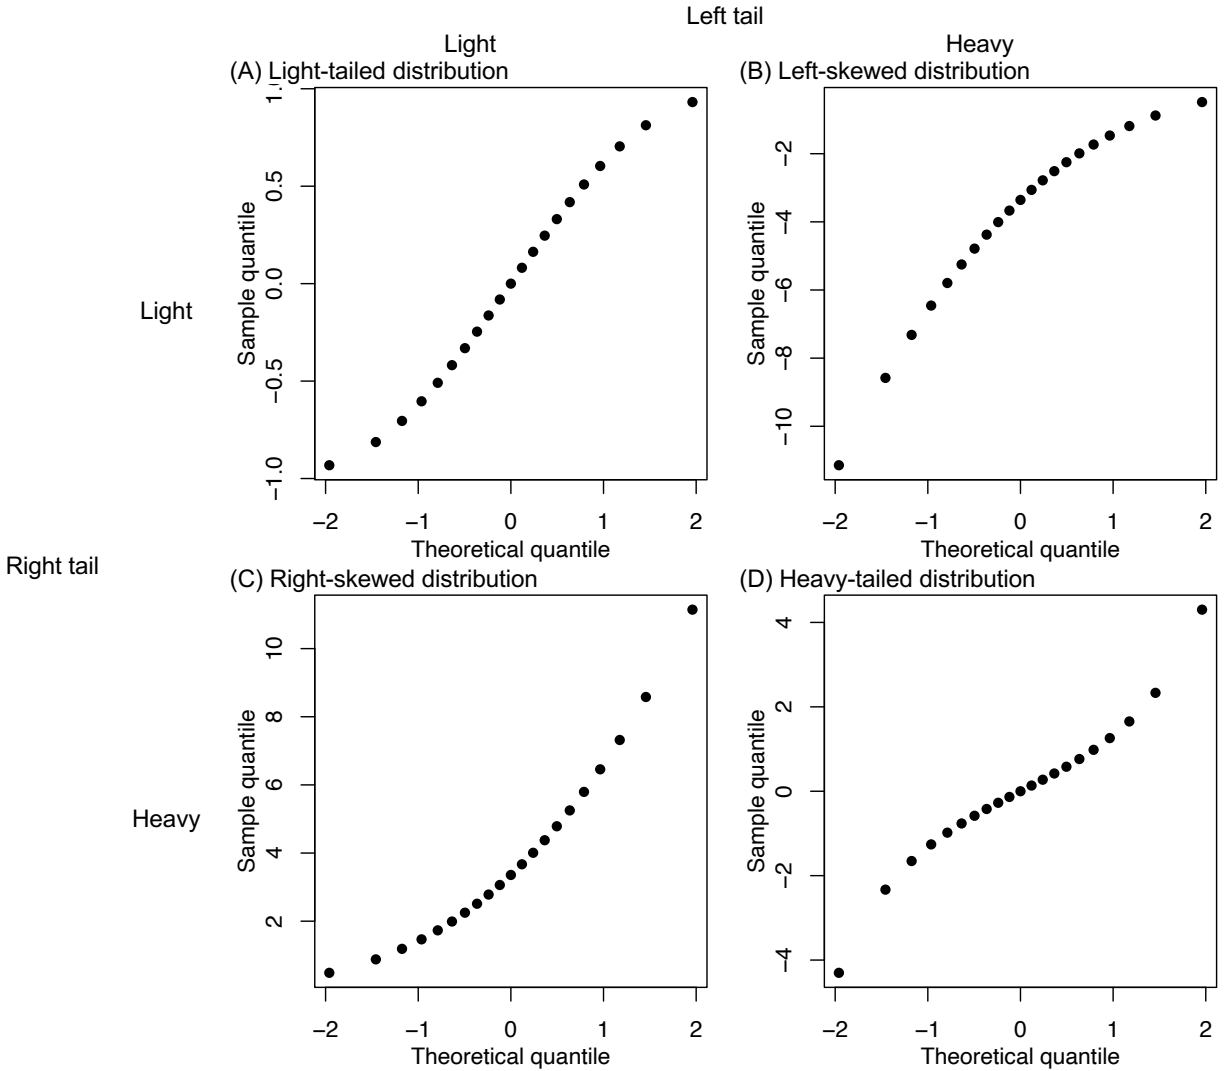

**Fig. S1.** Examples of Q–Q plots in four tail scenarios with respect to the normal distribution’s tails. (A) Truncated normal distribution with mean 0 and variance 1, truncated within the interval (0, 1). (B) Distribution of the negative value of a gamma variable with shape and scale parameters both equal 2. (C) Gamma distribution with shape and scale parameters both equal 2. (D)  $t_2$  distribution.

(A) Normal distribution

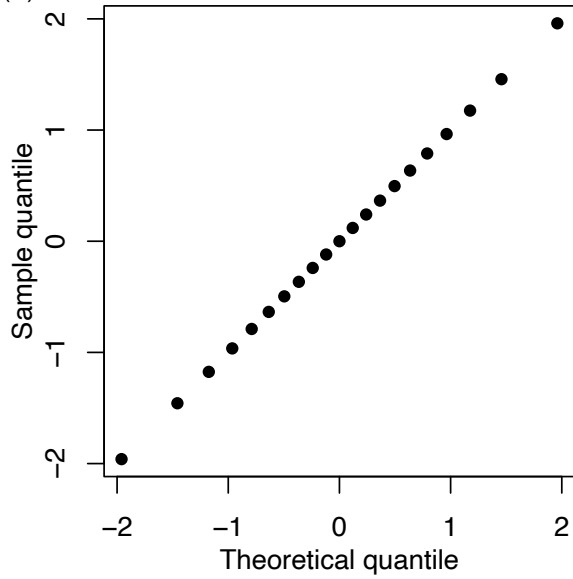

(B) Bimodal distribution

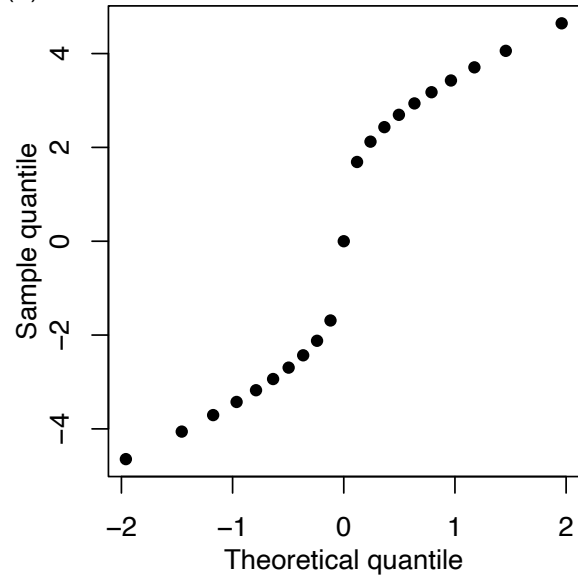

**Fig. S2.** Examples of Q–Q plots in unimodal and bimodal scenarios. (A) The standard normal distribution. (B) The mixture of two normal distributions,  $0.5N(-3, 1) + 0.5N(3, 1)$ .

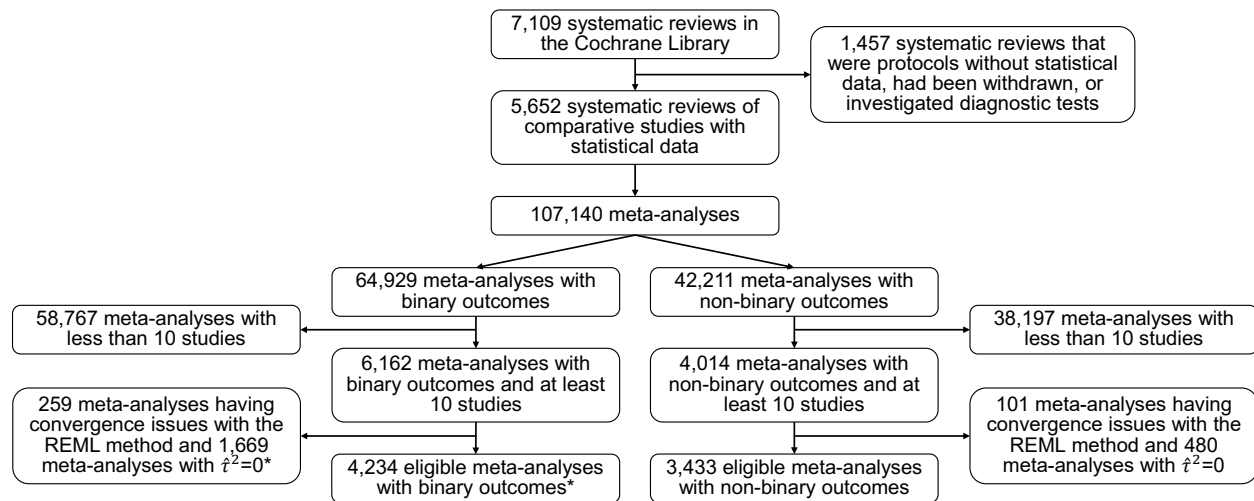

\*Based on originally reported effect measures

**Fig. S3.** Flow chart of selecting the meta-analyses from the Cochrane Library.
